# Supplementary material for: Plant sizes and shapes above and belowground and their interactions with climate
Source: PubMed Central journal article supplement (PMC9311740; doi:10.1111/nph.18031), 2022-03-08
Supplement: NPH-235-1032-s002.pdf [file NPH-235-1032-s002.pdf]

## ***New Phytologist* Supporting Information**

Article title: Plant sizes and shapes above- and belowground and their interactions with climate  
Authors: Shersingh Joseph Tumber-Dávila, H. Jochen Schenk, Enzai Du, and Robert B. Jackson  
Article acceptance date: 30 January 2022

The following Supporting Information is available for this article:

**Dataset S1** Root Systems of Individual Plants Database and manuscript tables. (Provided as a separate file)

**Fig. S1** Map of RSIP observations by versions.

**Fig. S2** Comparison of Root Profiles for Global Ecosystems rooting depth estimates to the plant functional type (PFT) estimates.

**Fig. S3** The effect that climate variables have on individual-plant rooting depth versus ecosystem-scale rooting depth.

**Fig. S4.** PIC of max rooting depth ( $D_R$ ) to aboveground plant size ( $H_S$ ,  $W_S$ ,  $V_S$ , &  $DBH$ ).

**Fig. S5.** PIC of max lateral spread ( $L_R$ ) to aboveground plant size ( $H_S$ ,  $W_S$ ,  $V_S$ , &  $DBH$ ).

**Fig. S6** The influence of climate metrics on max rooting depth ( $D_R$ ) and max lateral spread ( $L_R$ ).

**Fig. S7** PIC of max rooting depth ( $D_R$ ) to climate metrics ( $MAE$ ,  $MAP$ ,  $A_i$ , &  $S_a$ ).

**Fig. S8** PIC of max lateral spread ( $L_R$ ) to climate metrics ( $MAE$ ,  $MAP$ ,  $A_i$ , &  $S_a$ ).

**Fig S9** Correlation matrix for the above- and belowground plant size metrics.

**Table S1** Description of RSIP Parameters (n is the total number of observations).

**Table S2** RSIP categorical groups.

**Table S3** Pagel's Lambda values for the above- and belowground plant measurements.

**Table S4** Comparison of absolute extents ( $D_R$  &  $L_R$ ) to climate metrics.

**Table S5** Nonlinear regression curves for the shape ratios plotted on Fig. 7.

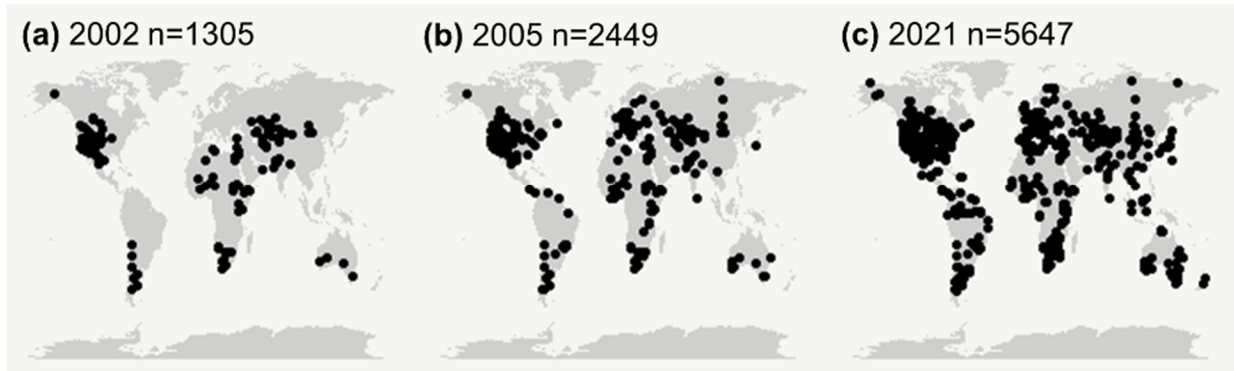

**Fig. S1** Maps of Root Systems of Individual Plants (RSIP) observations by versions. (a) The original, first published, version of the RSIP database included 1305 entries for water-limited systems with  $\leq 1,000$  mm mean annual precipitation (Schenk & Jackson, 2002a). (b) Version 2, published in 2005, expanded the RSIP to 2449 observations spanning all climates (Schenk & Jackson, 2005). (c) Our new RSIP with 5,647 total observations, a more than two-fold expansion.

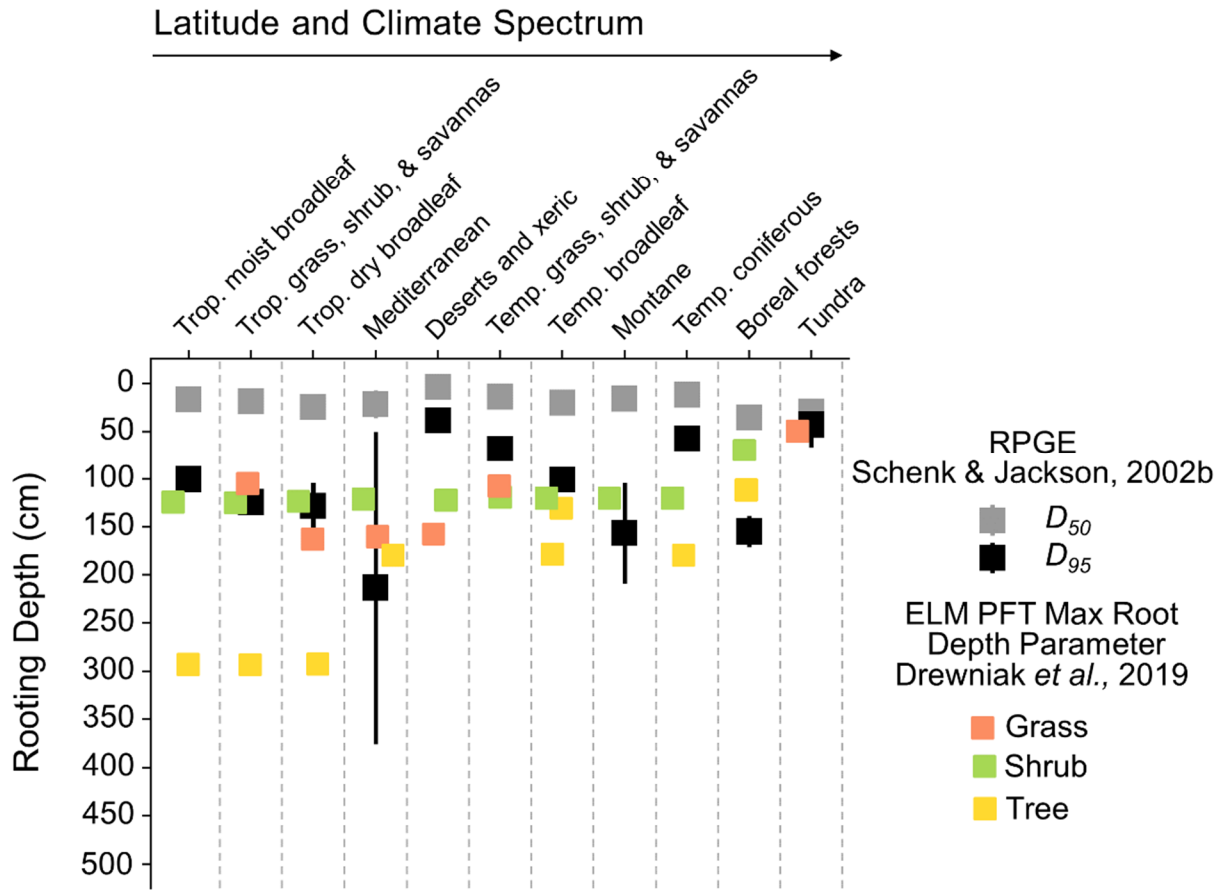

**Fig. S2** Comparison of Root Profiles for Global Ecosystems (RPGE)  $D_{50}$  and  $D_{95}$  estimates (Schenk & Jackson, 2002b;2005) to the plant functional type (PFT) estimates used in the E3SM land model (ELM). Maximum Rooting Depth of PFTs in ELM were taken adapted from the values given in Table 1 from Drewniak *et al.* (2019). The error bars for the RPGE values represent the standard error. There are no error estimates for the ELM PFT max rooting depth values because they are singular values used as inputs for the model.

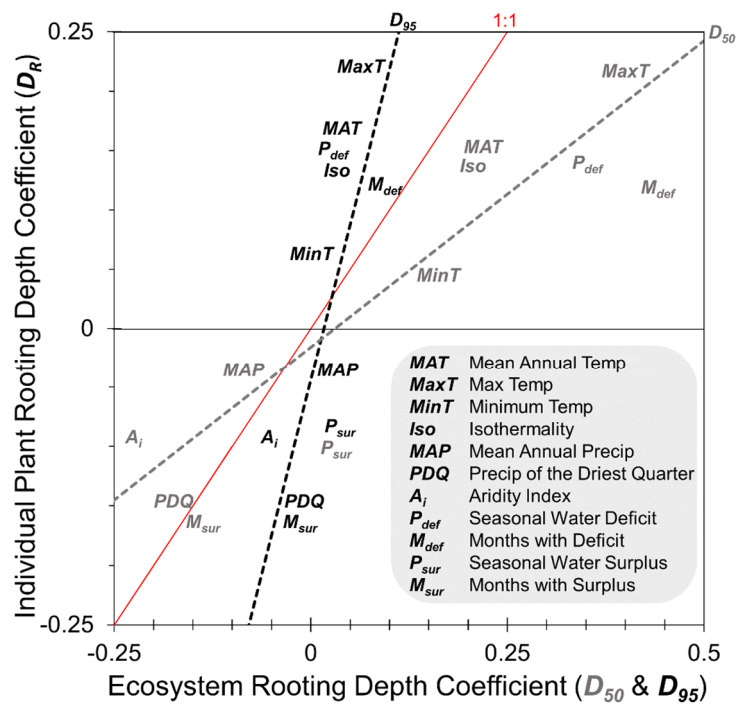

**Fig. S3** Comparing the effect that climate variables had on individual plant rooting depth (RSIP  $D_R$ ) on the y-axis to Root Profiles for Global Ecosystems (RPGE)  $D_{50}$  (gray) and  $D_{95}$  (black) on the x-axis. The coefficients were taken from linear mixed effects models with biome as random effects, rooting depth metrics as dependent variables, and climate parameters as fixed effects. Only a subset of the parameters used to measure the linear regressions are shown, with the labels defined in the figure key. The red line is the 1:1 baseline. The steeper black regression represents the relationship between  $D_R$  and  $D_{95}$ , where  $D_R$  is more sensitive to the climate metrics compared to  $D_{95}$  ( $y=2.62x - 0.04$ ,  $R^2 = 0.71$ ). The gray line with the lower slope represents the relationship between  $D_R$  and  $D_{50}$ , where  $D_{50}$  is more sensitive towards the climate metrics ( $y = 0.52x - 0.016$ ,  $R^2 = 0.81$ ). Coefficient values that fall near the 1:1 line indicate that both rooting depth estimates have similar relationships with the parameter. Variables included in the regression that were omitted from the plot were: Precipitation of Wettest Month, Precipitation of Driest Month, Precipitation of Wettest Quarter, Precipitation of Warmest Quarter, Precipitation of Coldest Quarter, Mean Temperature of Warmest Quarter, Mean Temperature of Coldest Quarter, Mean Diurnal Range, Temperature Seasonality, Temperature Annual Range, Mean Temperature of Wettest Quarter, and Mean Temperature of Driest Quarter.

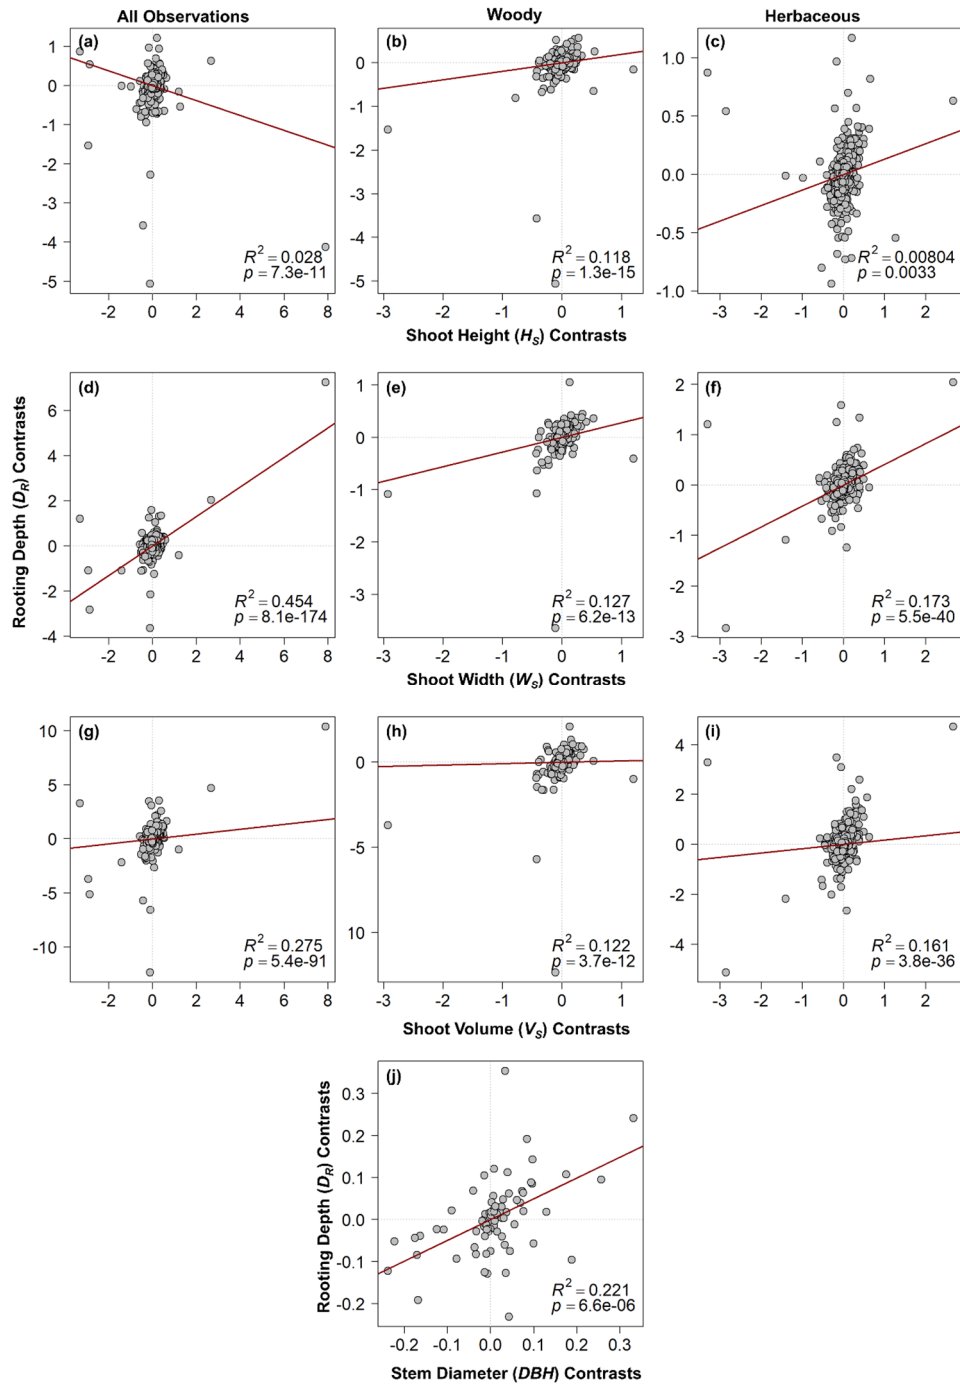

**Fig. S4** The relationships between maximum rooting depth ( $D_R$ ; y-axes) to aboveground plant size ( $H_S$ ,  $W_S$ ,  $V_S$ , &  $DBH$ ; x-axes) analyzed using phylogenetically independent contrast regressions for all observations (a, d, & g), woody plants (b, e, h, & j), and herbaceous plants (c, f, & i). Statistically significant relationships ( $p < 0.05$ ) are fitted with linear regressions using dark red lines.

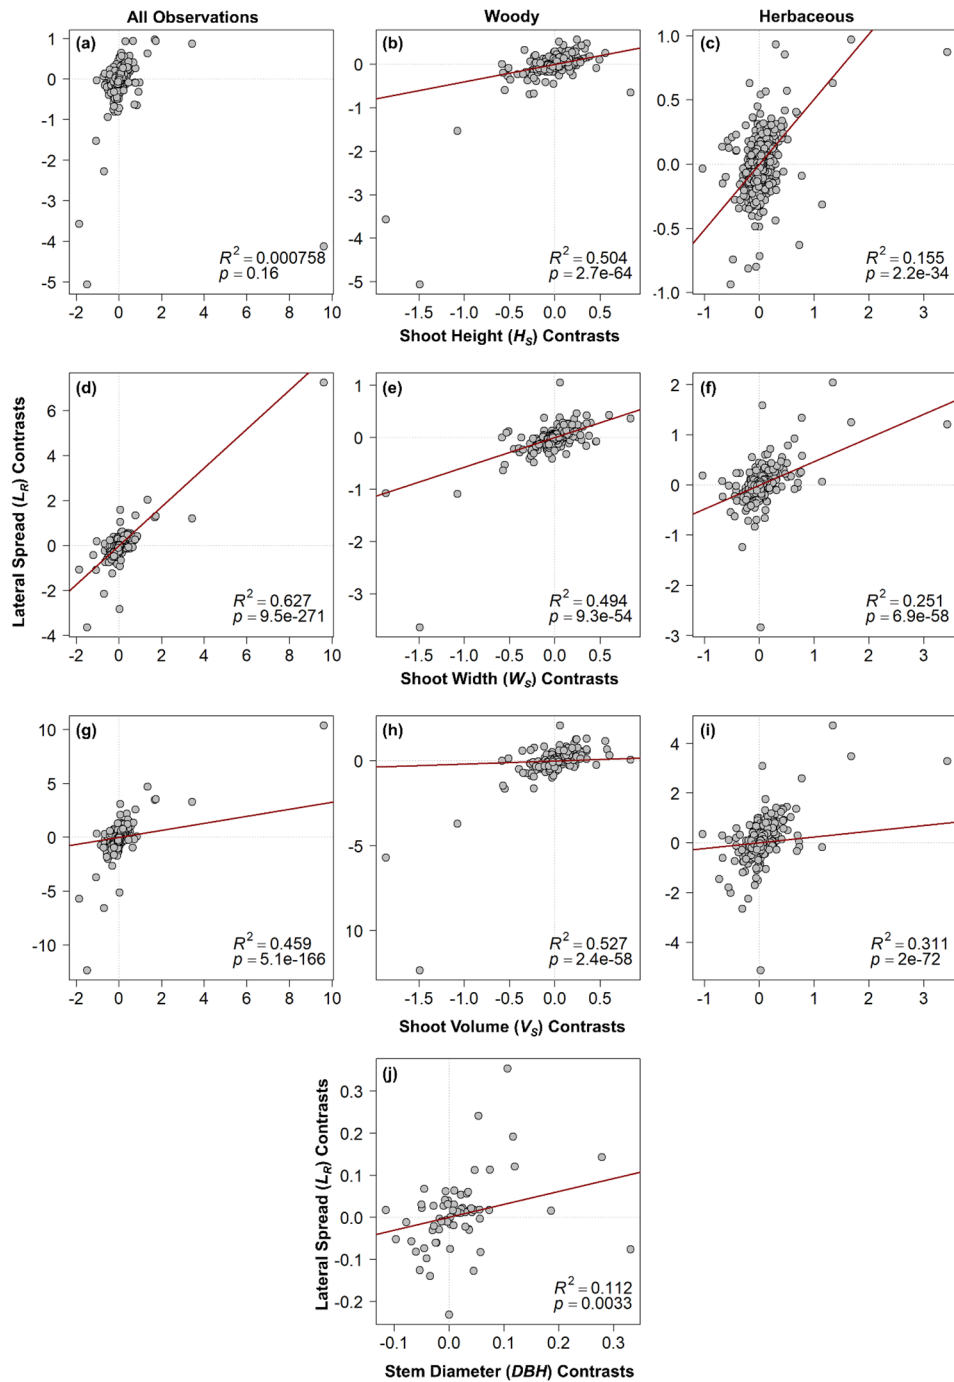

**Fig. S5** The relationships between maximum lateral spread ( $L_R$ ; y-axes) to aboveground plant size ( $H_S$ ,  $W_S$ ,  $V_S$ , &  $DBH$ ; x-axes) analyzed using phylogenetically independent contrast regressions for all observations (a, d, & g), woody plants (b, e, h, & j), and herbaceous plants (c, f, & i). Statistically significant relationships ( $p < 0.05$ ) are fitted with linear regressions using dark red lines.

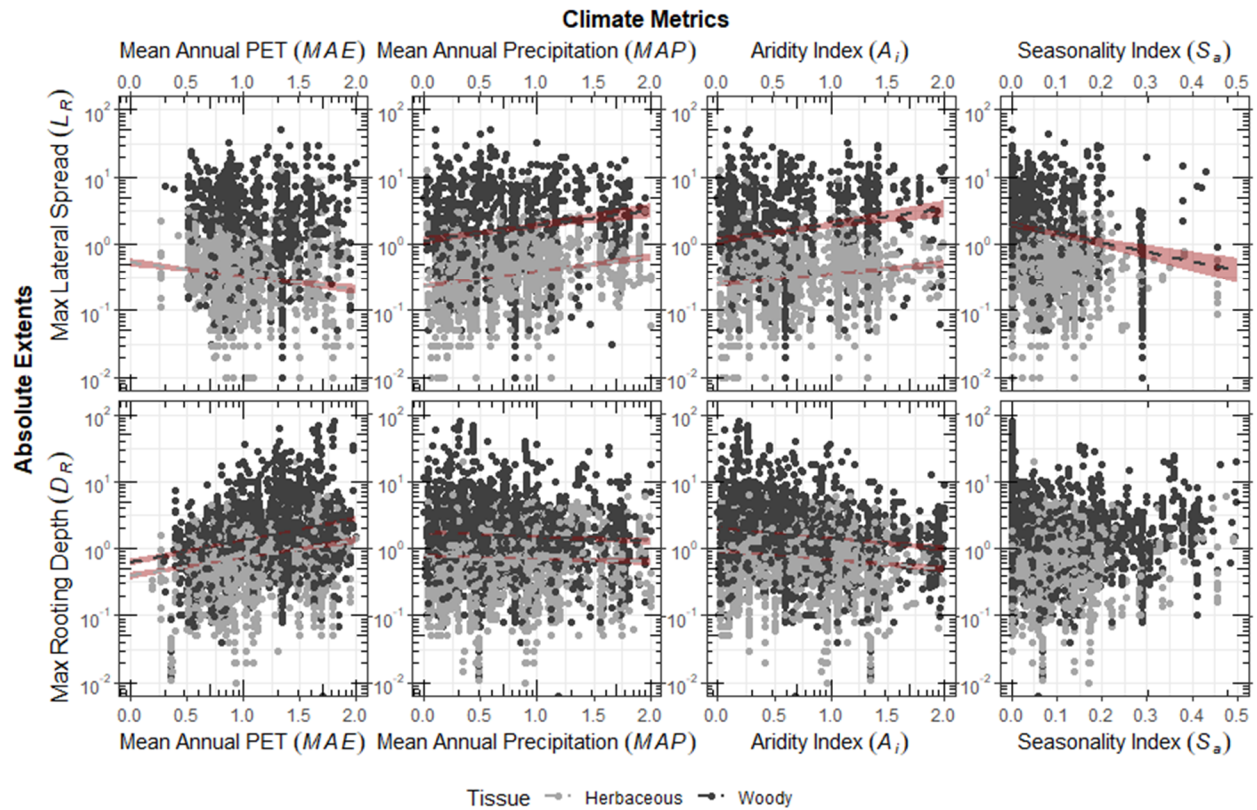

**Fig. S6** The influence of climate metrics on max rooting depth ( $D_R$ ; lower row) and max lateral spread ( $L_R$ ; upper row). The climate metrics shown here, from left to right, are mean annual precipitation ( $MAP$ ), mean annual potential evapotranspiration ( $MAE$ ), mean annual precipitation ( $MAP$ ), aridity index ( $A_i$ ), seasonality index ( $S_a$ ). Dark gray points are woody plants, and light gray points are herbaceous plants. The dashed lines (woody in dark gray and herbs in light gray) represent a linear regression where  $p < 0.05$  in the form of  $y = \beta + \alpha * x$ , and the red shaded regions are the 95% confidence interval. The statistics and the parameters for the linear regressions are in Table S4. The axes scales are in common log (base 10).

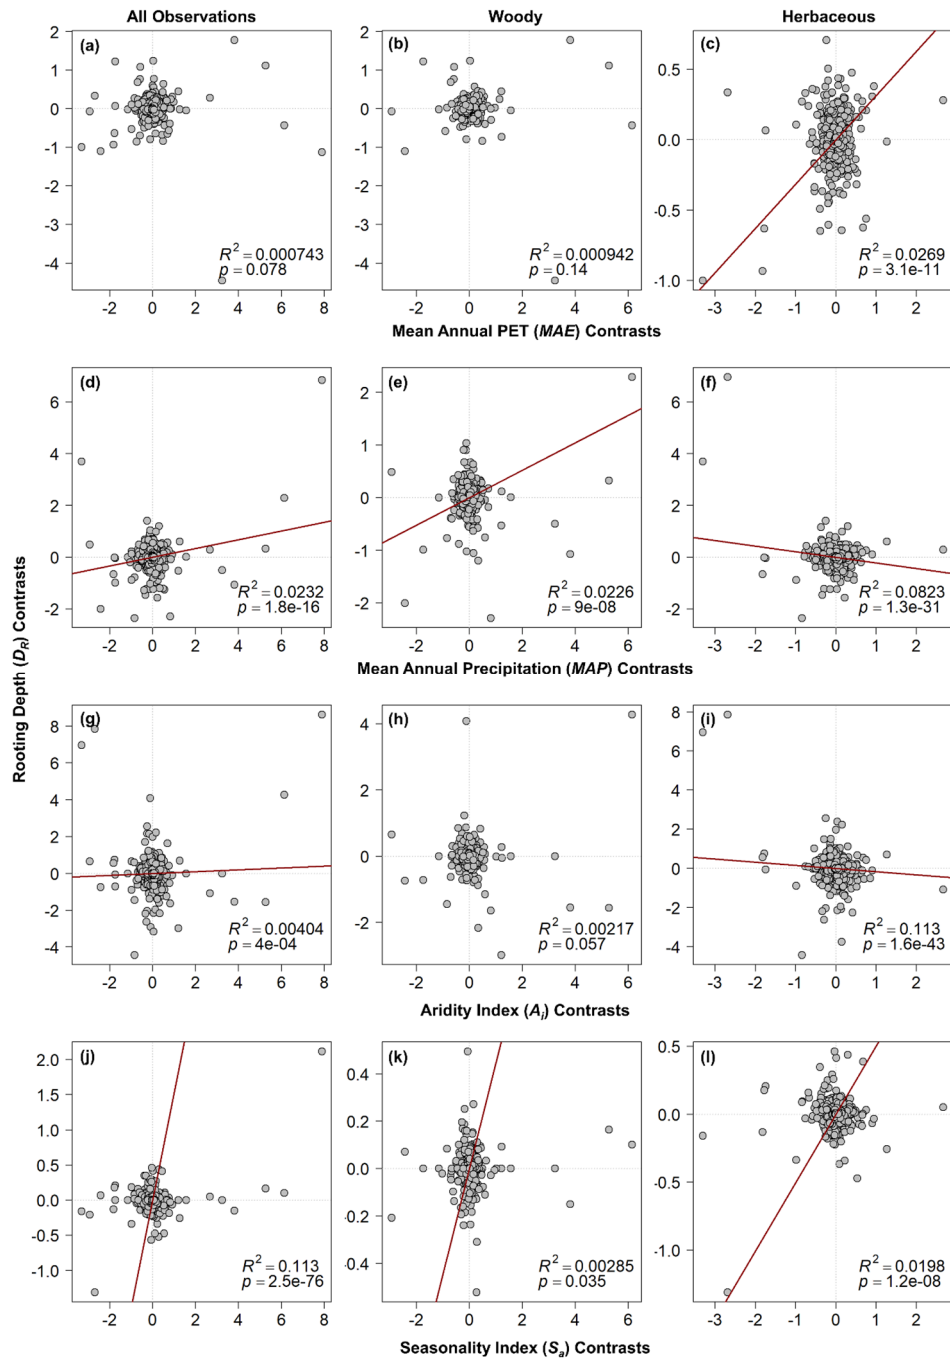

**Fig. S7** The relationships between maximum rooting depth ( $D_R$ ; y-axes) to the climate metrics (MAE, MAP,  $A_i$ , &  $S_a$ ; x-axes) analyzed using phylogenetically independent contrast regressions for all observations (a, d, g, & j), woody plants (b, e, h, & k), and herbaceous plants (c, f, i, & l). Statistically significant relationships ( $p < 0.05$ ) are fitted with linear regressions using dark red lines.



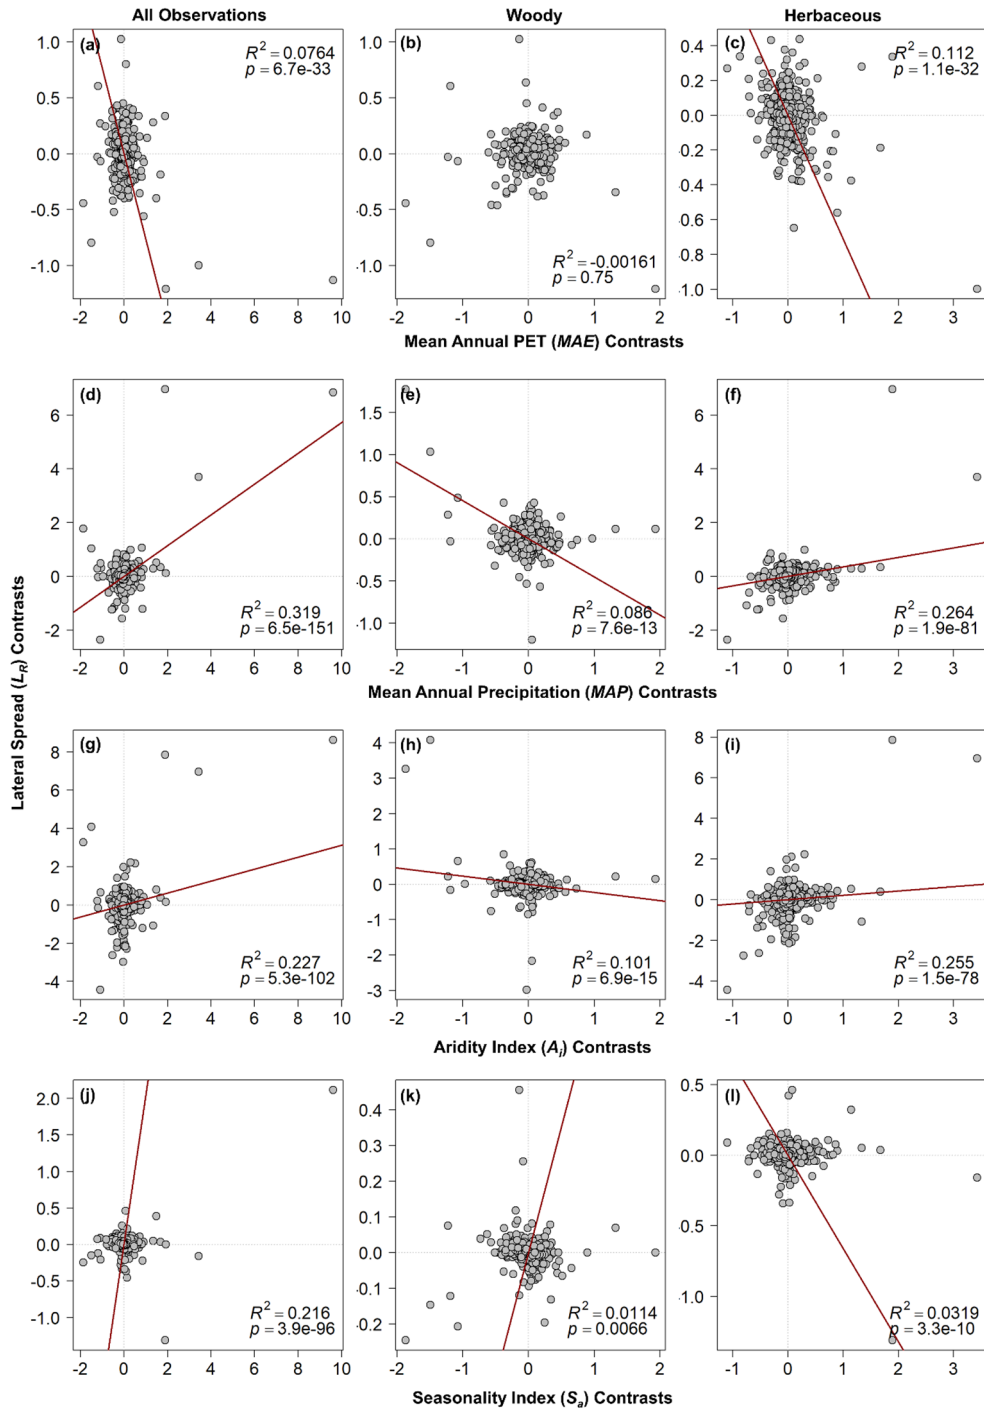

**Fig. S8** The relationships between maximum lateral spread ( $L_R$ ; y-axes) to the climate metrics ( $MAE$ ,  $MAP$ ,  $A_i$ , &  $S_a$ ; x-axes) analyzed using phylogenetically independent contrast regressions for all observations (a, d, g, & j), woody plants (b, e, h, & k), and herbaceous plants (c, f, i, & l). Statistically significant relationships ( $p < 0.05$ ) are fitted with linear regressions using dark red lines.

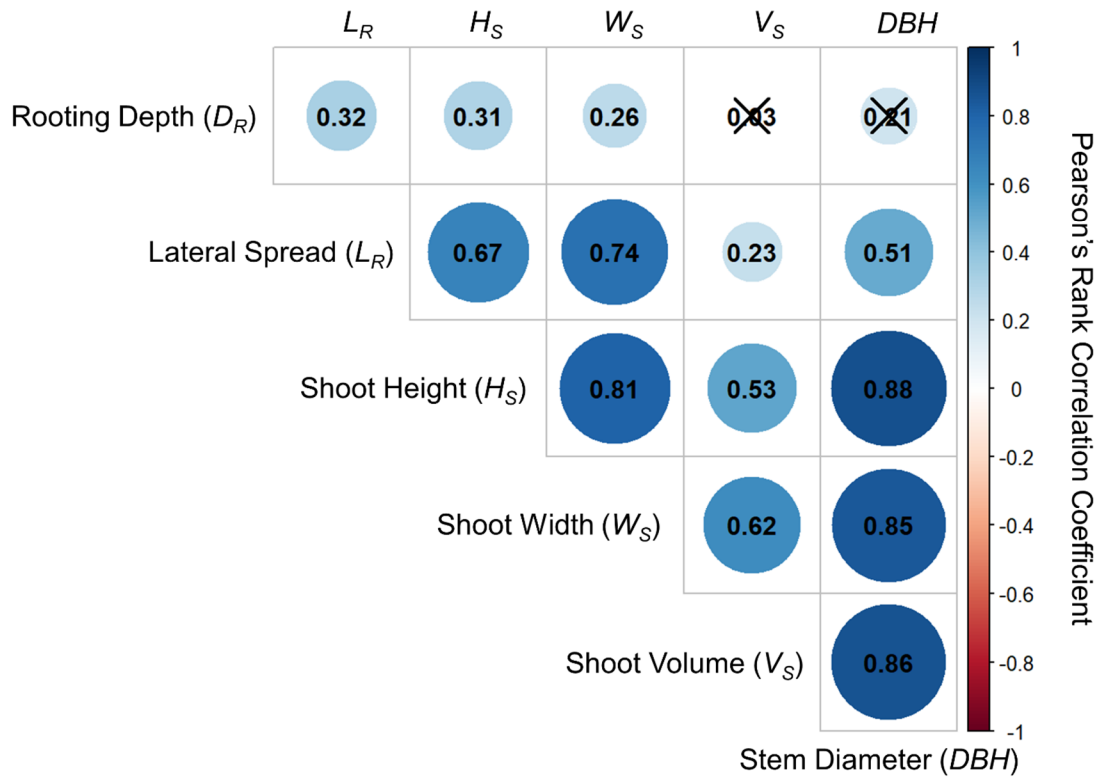

**Fig. S9** Pearson's rank correlation matrix for the above- and belowground plant size metrics. Darker blue and larger circles represent more positive correlations. Insignificant correlations are crossed out ( $p > 0.01$ ). Coefficient is written in black text.

**Table S1** Description of RSIP Parameters (n is the total number of observations).

| Entry identification |      |                                                                                                                                             |                         |
|----------------------|------|---------------------------------------------------------------------------------------------------------------------------------------------|-------------------------|
| Variable name        | n    | Description                                                                                                                                 | Used in Random Forest ? |
| ID                   | 5647 | Unique identification number for each observation                                                                                           |                         |
| Reference            | 5647 | Reference that the entry data originates from, where it was taken from, and the figure/table/page #                                         |                         |
| Plant description    |      |                                                                                                                                             |                         |
| Variable name        | n    | Description                                                                                                                                 |                         |
| Species              | 5639 | current taxonomic nomenclature ( <i>Genus species</i> ). Found using plant databases (NRCS, 2021; Roskov et al., 2017; Smith & Brown, 2018) |                         |
| Family               | 5634 | Current taxonomic family classification found using plant databases (NRCS, 2021; Roskov et al., 2017; Smith & Brown, 2018)                  | X                       |
| Life_span            | 5641 | Plant life span found using plant databases (Roskov et al., 2017; NRCS, 2021) or reported in reference literature; (see Table S2)           | X                       |
| Growth_form          | 5640 | Plant growth form found using plant databases (Roskov et al., 2017; NRCS, 2021) or reported in reference literature (see Table S2)          | X                       |
| Tissue               | 5997 | Woody or herbaceous (see Table S2)                                                                                                          | X                       |
| Seed_Cat             | 5630 | Monocot, Dicot, or Gymnosperm (see Table S2)                                                                                                | X                       |
| Leaf_strategy        | 2515 | Is the leafing strategy evergreen or deciduous (see Table S2)                                                                               | X                       |
| Leaf_form            | 2206 | Is the leafing strategy broad-leaf or needle-leaf (see Table S2)                                                                            | X                       |
| PS_type              | 5649 | Photosynthesis pathway (see Table S2)                                                                                                       | X                       |
| Growth measurements  |      |                                                                                                                                             |                         |
| Variable name        | n    | Description                                                                                                                                 |                         |
| D <sub>R</sub>       | 5633 | Maximum rooting depth of plant [m]                                                                                                          | X                       |
| L <sub>R</sub>       | 2874 | Maximum lateral root spread/one-sided (radius) linear distance from stem reached by roots [m]                                               | X                       |
| W <sub>R</sub>       | 1756 | Rooting spread, aka maximum root system diameter [m]                                                                                        |                         |
| D <sub>L</sub>       | 1769 | Depth of maximum lateral root (L <sub>R</sub> ) [m]                                                                                         |                         |
| H <sub>S</sub>       | 2373 | Height of plant shoot [m]                                                                                                                   | X                       |
| W <sub>S</sub>       | 2074 | Width of plant shoot [m]                                                                                                                    | X                       |
| DBH                  | 139  | Diameter at breast height of trees branching higher than 1.5meters; recorded at 1.3-1.5 meters [cm]                                         |                         |

| Relative measurements                           |      |                                                                                                                                                                            |          |
|-------------------------------------------------|------|----------------------------------------------------------------------------------------------------------------------------------------------------------------------------|----------|
| Variable name                                   | n    | Description                                                                                                                                                                |          |
| $V_R$                                           | 2857 | Estimate of root system volume using a bi-conal shape ( $V_R[m^3]=\pi \times L_R^2 \times D_R \times 2/3$ )                                                                |          |
| $V_S$                                           | 2010 | Estimate of shoot volume using an ellipsoid shape ( $V_S [m^3]=\pi \times H_S[m] \times W_S[m]^2/6$ )                                                                      |          |
| $D_{rel}$                                       | 2010 | Relative maximum rooting depth ( $D_{rel} = D_R / V_S$ )                                                                                                                   |          |
| $L_{rel}$                                       | 2010 | Relative maximum lateral spread ( $L_{rel} = L_R / V_S$ )                                                                                                                  |          |
| Dimensional aspect ratios and shoot:root ratios |      |                                                                                                                                                                            |          |
| Variable name                                   | n    | Description                                                                                                                                                                |          |
| $Y:X_{shoot}$                                   | 2010 | Above-ground dimensional aspect ratio indicator ( $Y:X_{shoot} =H_S/W_S$ )                                                                                                 |          |
| $Y:X_{root}$                                    | 2938 | Below-ground dimensional aspect ratio ( $Y:X_{root} =D_R/W_R$ )                                                                                                            |          |
| $S:R_y$                                         | 2368 | Vertical coordinative strategy indicator ( $S:R_y =H_S/D_R$ )                                                                                                              |          |
| $S:R_x$                                         | 1974 | Horizontal coordinative strategy indicator ( $S:R_x =W_S/W_R$ )                                                                                                            |          |
| Location                                        |      |                                                                                                                                                                            |          |
| Variable name                                   | n    | Description                                                                                                                                                                |          |
| Biome                                           | 5609 | Biome of entry, taken from original literature or based by location. following the WWF major habitat type classification (Olson <i>et al.</i> ,2001; see <b>Table S2</b> ) | <b>X</b> |
| Eco_Name                                        | 5559 | Unique eco-regeion name (Olson <i>et al.</i> , 2001)                                                                                                                       |          |
| Realm                                           | 5558 | Biogeographic Realm (Olson <i>et al.</i> , 2001; see Table <b>S2</b> )                                                                                                     | <b>X</b> |
| Eco_ID                                          | 5559 | Unique id for the ecoregion with a realm-biome-ecoregion code in the form of: RR-BB-EE (Olson <i>et al.</i> , 2001)                                                        | <b>X</b> |
| Vegetation                                      | 2252 | Dominant vegetation of ecosystem or biome (see Table <b>S2</b> )                                                                                                           |          |
| Location                                        | 5622 | Geographic location (usually in terms of nearest city, state/province, region, or country)                                                                                 |          |
| Lat                                             | 5591 | Latitude (in decimal degrees)                                                                                                                                              | <b>X</b> |
| Long                                            | 5591 | Longitude (in decimal degrees)                                                                                                                                             | <b>X</b> |
| Spatial_buffer                                  | 3332 | Error estimate for the latitude and longitude, meant to serve as a buffer or radius that the point represents [km]                                                         |          |
| Elevation                                       | 4327 | Elevation [m]                                                                                                                                                              | <b>X</b> |
| Soil                                            |      |                                                                                                                                                                            |          |
| Variable name                                   | n    | Description                                                                                                                                                                |          |
| Soil_description                                | 4360 | Description of soil                                                                                                                                                        |          |
| ST <sub>USDA</sub>                              | 5191 | Soil texture categories taken from the USDA system (see Table <b>S2</b> )                                                                                                  | <b>X</b> |
| ST <sub>EU</sub>                                | 5189 | Soil texture categories taken from the EU system (see Table <b>S2</b> )                                                                                                    | <b>X</b> |
| Water_Table_Depth                               | 507  | Water Table Depth from Fan <i>et al.</i> (2017)                                                                                                                            |          |
| Climate                                         |      |                                                                                                                                                                            |          |
| Variable name                                   | n    | Description                                                                                                                                                                |          |

|                     |      |                                                                                                                                           |   |
|---------------------|------|-------------------------------------------------------------------------------------------------------------------------------------------|---|
| BIO1                | 5559 | Annual Mean Temperature [K]                                                                                                               | X |
| BIO2                | 5559 | Mean Diurnal Range (Mean of monthly (max temp - min temp)) [K]                                                                            | X |
| BIO3                | 5559 | Isothermality (BIO2/BIO7) (* 100)                                                                                                         | X |
| BIO4                | 5559 | Temperature Seasonality (standard deviation *100)                                                                                         | X |
| BIO5                | 5559 | Max Temperature of Warmest Month [K]                                                                                                      | X |
| BIO6                | 5559 | Min Temperature of Coldest Month [K]                                                                                                      | X |
| BIO7                | 5559 | Temperature Annual Range (BIO5-BIO6) [K]                                                                                                  | X |
| BIO8                | 5559 | Mean Temperature of Wettest Quarter [K]                                                                                                   | X |
| BIO9                | 5559 | Mean Temperature of Driest Quarter [K]                                                                                                    | X |
| BIO10               | 5559 | Mean Temperature of Warmest Quarter [K]                                                                                                   | X |
| BIO11               | 5559 | Mean Temperature of Coldest Quarter [K]                                                                                                   | X |
| BIO13               | 5559 | Precipitation of Wettest Month [m]                                                                                                        | X |
| BIO14               | 5559 | Precipitation of Driest Month [m]                                                                                                         | X |
| BIO15               | 5559 | Precipitation Seasonality (Coefficient of Variation)                                                                                      | X |
| BIO16               | 5559 | Precipitation of Wettest Quarter [m]                                                                                                      | X |
| BIO17               | 5559 | Precipitation of Driest Quarter [m]                                                                                                       | X |
| BIO18               | 5559 | Precipitation of Warmest Quarter [m]                                                                                                      | X |
| BIO19               | 5559 | Precipitation of Coldest Quarter [m]                                                                                                      | X |
| MAP                 | 5590 | Mean annual precipitation. taken from primary literature or WorldClim data (BIO12) [m]                                                    | X |
| MAE                 | 5587 | Mean annual potential evapotranspiration. taken from primary literature or calculated using Hargreave's equation (Trabucco & Zomer, 2019) | X |
| A <sub>i</sub>      | 5587 | Aridity index (=MAP/MAE)                                                                                                                  | X |
| S <sub>a</sub>      | 5553 | Annual water storage index:<br>$S_a = \min[P_{sur}, P_{def}]$                                                                             | X |
| M <sub>sur</sub>    | 5493 | Months with a surplus of water (MAP <sub>m</sub> - PET <sub>m</sub> > 0)                                                                  | X |
| M <sub>def</sub>    | 5552 | Months with a deficit of water (PET <sub>m</sub> - MAP <sub>m</sub> > 0)                                                                  | X |
| P <sub>sur</sub>    | 5493 | Seasonal surplus of water: $P_{sur} = \sum_{m, MAP_m - PET_m > 0} (MAP_m - PET_m)$                                                        | X |
| P <sub>def</sub>    | 5552 | Seasonal deficit of water: $P_{def} = \sum_{m, PET_m - MAP_m > 0} (PET_m - MAP_m)$                                                        | X |
| R <sub>class</sub>  | 5590 | Classification of MAP (see Table S2)                                                                                                      | X |
| R <sub>regime</sub> | 5615 | Precipitation seasonality regime classified using MAP, latitude, and BIO18-19 (see Table S2)                                              | X |
| A <sub>class</sub>  | 5587 | Classification of A <sub>i</sub> (see Table S2)                                                                                           | X |

**Table S2** RSIP categorical groups. The number of total observations (n), and unique species, geographic locations, and studies for each class is shown.

| Life_span     |      |         |           |         |                                                                 |
|---------------|------|---------|-----------|---------|-----------------------------------------------------------------|
| Class         | n    | species | locations | studies | Description                                                     |
| A             | 557  | 367     | 198       | 82      | Annual plants (whole life cycle within 1 year)                  |
| P             | 5082 | 2635    | 1941      | 611     | Perennial plants (includes biennials and all non-annual plants) |
| Growth_Form   |      |         |           |         |                                                                 |
| Class         | n    | species | locations | studies | Description                                                     |
| Forb          | 1715 | 1207    | 528       | 116     | Forbs, herbaceous plants that are not grasses                   |
| Grass         | 991  | 467     | 374       | 158     | Grasses                                                         |
| Semi-shrub    | 574  | 318     | 206       | 111     | Semi-shrub                                                      |
| Shrub         | 694  | 367     | 351       | 194     | Shrub                                                           |
| Succulent     | 89   | 67      | 54        | 49      | Succulent                                                       |
| Tree          | 1576 | 613     | 1010      | 350     | Tree                                                            |
| Tissue        |      |         |           |         |                                                                 |
| Class         | n    | species | locations | studies | Description                                                     |
| Herbaceous    | 2706 | 1674    | 764       | 211     | Herbaceous plants                                               |
| Woody         | 2844 | 1264    | 1427      | 530     | Woody plants                                                    |
| Seed_Cat      |      |         |           |         |                                                                 |
| Class         | n    | species | locations | studies | Description                                                     |
| Dicot         | 3947 | 2255    | 1514      | 506     | Dicot Plants (Magnoliopsida)                                    |
| Gymnosperm    | 523  | 136     | 340       | 118     | Gymnosperm Plants                                               |
| Monocot       | 1135 | 577     | 420       | 170     | Plants with only one cotyledon                                  |
| Pteridophyte  | 24   | 20      | 19        | 16      | Pteridophyte plants                                             |
| Leaf_strategy |      |         |           |         |                                                                 |
| Class         | n    | species | locations | studies | Description                                                     |
| D             | 1130 | 467     | 721       | 265     | Deciduous (including winter-deciduous and drought-deciduous)    |
| E             | 1385 | 602     | 126       | 363     | Evergreen (including some semi-evergreen)                       |
| Leaf_form     |      |         |           |         |                                                                 |
| Class         | n    | species | locations | studies | Description                                                     |
| B             | 1640 | 780     | 967       | 403     | Broad-leaf                                                      |
| N             | 557  | 163     | 352       | 127     | Needle-leaf                                                     |
| P             | 9    | 8       | 9         | 8       | Palm                                                            |
| PS_type       |      |         |           |         |                                                                 |
| Class         | n    | species | locations | studies | Description                                                     |
| C3            | 4918 | 2660    | 1899      | 583     | C3 Photosynthetic Pathway                                       |
| C3-C4         | 617  | 255     | 261       | 138     | C3/C4 intermediates                                             |

|                   |      |         |           |         |                                                             |
|-------------------|------|---------|-----------|---------|-------------------------------------------------------------|
| C4                | 10   | 4       | 7         | 6       | C4 Photosynthetic Pathway                                   |
| CAM               | 103  | 75      | 59        | 52      | Crassulacean Acid Metabolism<br>Photosynthesis              |
| Biome             |      |         |           |         |                                                             |
| Class             | n    | species | locations | studies | Description                                                 |
| 1                 | 1240 | 731     | 306       | 191     | Deserts & xeric shrublands                                  |
| 2                 | 144  | 106     | 75        | 47      | Tropical & subtropical moist broadleaf forests              |
| 3                 | 247  | 128     | 222       | 22      | Tropical & subtropical dry broadleaf forests                |
| 4                 | 3    | 3       | 3         | 2       | Tropical & subtropical coniferous forests                   |
| 5                 | 649  | 416     | 324       | 103     | Temperate broadleaf & mixed forests                         |
| 6                 | 1111 | 706     | 383       | 43      | Temperate Conifer Forests                                   |
| 7                 | 187  | 50      | 108       | 26      | Boreal forests/Taiga                                        |
| 8                 | 301  | 165     | 103       | 63      | Tropical & Subtropical Grasslands,<br>Savannas & Shrublands |
| 9                 | 1020 | 552     | 350       | 86      | Temperate Grasslands, Savannas &<br>Shrublands              |
| 10                | 65   | 59      | 26        | 9       | Flooded Grasslands & Savannas                               |
| 11                | 222  | 171     | 25        | 15      | Montane Grasslands & Shrublands                             |
| 12                | 25   | 21      | 6         | 4       | Tundra                                                      |
| 13                | 379  | 253     | 142       | 73      | Mediterranean Forests, Woodlands & Scrub                    |
| Realm             |      |         |           |         |                                                             |
| Class             | n    | species | locations | studies | Description                                                 |
| AA                | 205  | 137     | 67        | 36      | Australasia                                                 |
| AT                | 512  | 270     | 315       | 85      | Afrotropical                                                |
| IM                | 143  | 97      | 36        | 30      | Indo-Malayan                                                |
| NA                | 1803 | 803     | 733       | 235     | Nearctic                                                    |
| NT                | 333  | 218     | 105       | 66      | Neotropical                                                 |
| OC                | 1    | 1       | 1         | 1       | Oceania                                                     |
| PA                | 2560 | 1541    | 757       | 154     | Palaearctic                                                 |
| Vegetation        |      |         |           |         |                                                             |
| Class             | n    | species | locations | studies | Description                                                 |
| G                 | 804  | 527     | 120       | 61      | Grasses, Grassland                                          |
| S                 | 1024 | 642     | 160       | 120     | Shrubs, Shrubland                                           |
| T                 | 423  | 249     | 124       | 91      | Trees, Forested                                             |
| USDA_soil_texture |      |         |           |         |                                                             |
| Class             | n    | species | locations | studies | Description                                                 |
| Cl                | 222  | 177     | 105       | 61      | Clay                                                        |
| SiCl              | 33   | 27      | 19        | 14      | Silty clay                                                  |

|                 |      |         |           |         |                                                                          |
|-----------------|------|---------|-----------|---------|--------------------------------------------------------------------------|
| SaCl            | 201  | 108     | 96        | 37      | Sandy clay                                                               |
| ClLo            | 248  | 221     | 107       | 53      | Clay loam                                                                |
| SiClLo          | 74   | 51      | 45        | 23      | Silty clay loam                                                          |
| SaClLo          | 97   | 84      | 64        | 33      | Sandy clay loam                                                          |
| Lo              | 897  | 616     | 248       | 86      | Loam                                                                     |
| SiLo            | 366  | 251     | 181       | 60      | Silty loam                                                               |
| SaLo            | 798  | 539     | 302       | 116     | Sandy loam                                                               |
| Si              | 115  | 89      | 75        | 23      | Silt                                                                     |
| LoSa            | 588  | 401     | 261       | 62      | Loamy sand                                                               |
| Sa              | 1205 | 821     | 496       | 225     | Sand                                                                     |
| Wa              | 126  | 104     | 55        | 23      | Wetland                                                                  |
| Ro              | 212  | 160     | 110       | 44      | Rocky                                                                    |
| EU_soil_texture |      |         |           |         |                                                                          |
| Class           | n    | species | locations | studies | Description                                                              |
| F               | 704  | 499     | 316       | 289     | Fine                                                                     |
| M               | 1442 | 911     | 522       | 544     | Medium                                                                   |
| C               | 2916 | 1779    | 1152      | 1400    | Coarse                                                                   |
| Rclass          |      |         |           |         |                                                                          |
| Class           | n    | species | locations | studies | Description                                                              |
| A               | 281  | 201     | 80        | 56      | $MAP \leq 0.125$                                                         |
| B               | 710  | 434     | 164       | 103     | $0.125 < MAP \leq 0.25$                                                  |
| C               | 1154 | 695     | 319       | 142     | $0.25 < MAP \leq 0.5$                                                    |
| D               | 3444 | 1963    | 1469      | 364     | $MAP > 0.5$                                                              |
| Rregime         |      |         |           |         |                                                                          |
| Class           | n    | species | locations | studies | Description                                                              |
| E               | 704  | 455     | 207       | 104     | all year; climates where $0.75 < BIO18/BIO19 < 1.25$                     |
| S               | 3140 | 1690    | 1090      | 235     | summer; temperate and subtropical climates where $BIO18/BIO19 \geq 1.25$ |
| TS              | 711  | 395     | 420       | 142     | tropical seasonal; seasonally dry climates lacking a cold season         |
| W               | 1059 | 690     | 336       | 182     | winter; temperate and subtropical climates where $BIO18/BIO19 \leq 0.75$ |
| Aclass          |      |         |           |         |                                                                          |
| Class           | n    | species | locations | studies | Description                                                              |
| ha              | 76   | 65      | 25        | 20      | hyper-arid; $AI < 0.03$                                                  |
| ar              | 882  | 530     | 233       | 142     | arid; $0.03 \leq AI < 0.2$                                               |
| sa              | 1346 | 778     | 459       | 164     | semi-arid; $0.2 \leq AI < 0.5$                                           |
| sh              | 595  | 406     | 265       | 80      | sub-humid; $0.5 \leq AI < 0.65$                                          |
| hu              | 2687 | 1599    | 1054      | 277     | humid; $AI \geq 0.65$                                                    |



**Table S3** Pagel's Lambda values for the above- and belowground plant measurements with the calculated log likelihood statistic (logL).

| <b>Trait</b>                             | <b>Lambda (<math>\lambda</math>)</b> | <b>logL</b> |
|------------------------------------------|--------------------------------------|-------------|
| <b>Rooting Depth (<math>D_R</math>)</b>  |                                      |             |
| All Observations                         | 0.553                                | -7872       |
| Woody                                    | 0.271                                | -3835       |
| Herbaceous                               | 0.644                                | -2098       |
| <b>Lateral Spread (<math>L_R</math>)</b> |                                      |             |
| All Observations                         | 0.968                                | -4648       |
| Woody                                    | 0.865                                | -1811       |
| Herbaceous                               | 0.186                                | -1322       |
| <b>Shoot Height (<math>H_S</math>)</b>   |                                      |             |
| All Observations                         | 0.985                                | -3937       |
| Woody                                    | 0.934                                | -1664       |
| Herbaceous                               | 0.558                                | -269        |
| <b>Shoot Width (<math>W_S</math>)</b>    |                                      |             |
| All Observations                         | 0.0001                               | -7784       |
| Woody                                    | 0.750                                | -1010       |
| Herbaceous                               | 0.0001                               | -5621       |
| <b>Shoot Volume (<math>V_S</math>)</b>   |                                      |             |
| All Observations                         | 0.0001                               | -15824      |
| Woody                                    | 1.000                                | -3423       |
| Herbaceous                               | 0.0001                               | -11252      |
| <b>Stem Diameter (<math>DBH</math>)</b>  |                                      |             |
| Trees                                    | 0.922                                | -349        |

\*Lambda is color coded from low to high phylogenetic signal: low lambda (< 0.3) in white, moderate lambda (0.3 to 0.6) in light blue, high lambda (0.6 to 0.9) in medium blue, very high lambda (> 0.9) in darker blue with white text.

**Table S4** Linear and phylogenetically independent contrast (PIC) relationships of belowground extents ( $D_R$  &  $L_R$ ) to climate metrics ( $MAE$ ,  $MAP$ ,  $A_i$ , &  $S_a$ ) in the form of  $y = \beta_0 + \beta_1 x$ , where  $y$  is  $D_R$  or  $L_R$ , where  $\beta_0$  is the intercept (Int.) and  $\beta_1$  is the slope. PIC regression intercepts set to zero.

|                                        | Max. Rooting Depth ( $D_R$ ) |                |             |                |             | Max. Lateral Spread ( $L_R$ ) |                |             |                |             |
|----------------------------------------|------------------------------|----------------|-------------|----------------|-------------|-------------------------------|----------------|-------------|----------------|-------------|
|                                        | Linear Regression            |                |             | PIC            |             | Linear Regression             |                |             | PIC            |             |
|                                        | Int.                         | Slope (SE)     | $R^2$ & $p$ | Slope (SE)     | $R^2$ & $p$ | Int.                          | Slope (SE)     | $R^2$ & $p$ | Slope (SE)     | $R^2$ & $p$ |
| <b>Mean Annual PET (MAE)</b>           |                              |                |             |                |             |                               |                |             |                |             |
| All Observations                       | -0.4                         | 0.4 (0.016)    | 0.1***      | -0.067 (0.038) | 0.001       | -0.4                          | 0.16 (0.034)   | 0.007***    | -0.77 (0.063)  | 0.076***    |
| Woody                                  | -0.2                         | 0.33 (0.021)   | 0.081***    | -0.076 (0.052) | 0.001       | 0.25                          | -0.042 (0.053) | 0.001       | -0.023 (0.075) | -0.002      |
| Herbaceous                             | -0.4                         | 0.25 (0.026)   | 0.035***    | 0.31 (0.047)   | 0.027***    | -0.3                          | -0.21 (0.034)  | 0.021***    | -0.71 (0.058)  | 0.112***    |
| <b>Mean Annual Precipitation (MAP)</b> |                              |                |             |                |             |                               |                |             |                |             |
| All Observations                       | 0.07                         | -0.067 (0.012) | 0.006***    | 0.17 (0.020)   | 0.023***    | -0.3                          | 0.12 (0.024)   | 0.009***    | 0.57 (0.020)   | 0.319***    |
| Woody                                  | 0.26                         | -0.096 (0.015) | 0.015***    | 0.26 (0.049)   | 0.023***    | 0.06                          | 0.21 (0.037)   | 0.029***    | -0.45 (0.062)  | 0.086***    |
| Herbaceous                             | -0.1                         | -0.053 (0.018) | 0.003*      | -0.22 (0.018)  | 0.082***    | -0.6                          | 0.17 (0.021)   | 0.037***    | 0.35 (0.017)   | 0.264***    |
| <b>Aridity Index (Ai)</b>              |                              |                |             |                |             |                               |                |             |                |             |
| All Observations                       | 0.14                         | -0.15 (0.0089) | 0.047***    | 0.050 (0.014)  | 0.004**     | -0.3                          | 0.063 (0.014)  | 0.007***    | 0.31 (0.014)   | 0.227***    |
| Woody                                  | 0.31                         | -0.17 (0.013)  | 0.062***    | 0.066 (0.035)  | 0.002       | 0.09                          | 0.15 (0.025)   | 0.031***    | -0.23 (0.029)  | 0.101***    |
| Herbaceous                             | -0.1                         | -0.094 (0.011) | 0.026***    | -0.16 (0.011)  | 0.113***    | -0.6                          | 0.1 (0.012)    | 0.043***    | 0.21 (0.10)    | 0.255***    |
| <b>Seasonality Index (Sa)</b>          |                              |                |             |                |             |                               |                |             |                |             |
| All Observations                       | 0.02                         | 0.068 (0.05)   | 0           | 1.54 (0.081)   | 0.113***    | -0.2                          | -0.63 (0.12)   | 0.01***     | 2.0 (0.092)    | 0.216***    |
| Woody                                  | 0.18                         | -0.018 (0.06)  | 0           | 0.45 (0.21)    | 0.003†      | 0.28                          | -1.1 (0.19)    | 0.031***    | 0.71 (0.26)    | 0.011*      |
| Herbaceous                             | -0.1                         | -0.078 (0.079) | 0           | 0.50 (0.088)   | 0.02***     | -0.5                          | 0.14 (0.1)     | 0.001       | -0.66 (0.10)   | 0.032***    |

\* $P$ -value significance codes: \*\*\* < 0.0001; \*\* < 0.001; \* < 0.01; † < 0.05

**Table S5** Nonlinear regression curves for the shape ratios plotted on Fig. 7.

| <i>Formula</i>                                          | $R^2$ | <i>Curves Intercept</i> |
|---------------------------------------------------------|-------|-------------------------|
| <b>Woody</b>                                            |       |                         |
| $Y:X_{root} = 1.5 * \exp(-0.5 * (\ln(A_i/0.26)/1.2)^2)$ | 0.88  | x=0.44, y=1.34          |
| $Y:X_{shoot} = 1.7 * A_i / (0.1 + A_i)$                 | 0.85  |                         |
| $S:R_y = 14 * A_i / (4.4 + A_i)$                        | 0.87  | x=0.14, y=0.43          |
| $S:R_x = 0.58 * \exp(-0.5 * (\ln(A_i/0.43)/1.5)^2)$     | 0.34  |                         |
| <b>Herbaceous</b>                                       |       |                         |
| $Y:X_{root} = 1.7 * x / (-0.005 + A_i)$                 | 0.23  | x=0.10, y=1.96          |
| $Y:X_{shoot} = 1.3 * x / (-0.04 + A_i)$                 | 0.04  |                         |
| $S:R_y = 1.7 * x / (-0.005 + A_i)$                      | 0.67  | x=0.18, y=0.55          |
| $S:R_x = 0.42 * x / (-0.04 + A_i)$                      | 0.85  |                         |

## References

- Drewniak BA. 2019.** Simulating Dynamic Roots in the Energy Exascale Earth System Land Model. *Journal of Advances in Modeling Earth Systems* **11**: 338–359.
- Fan Y, Miguez-Macho G, Jobbágy EG, Jackson RB, Otero-Casal C. 2017.** Hydrologic regulation of plant rooting depth. *Proceedings of the National Academy of Sciences* **114**: 10572.
- Fick SE, Hijmans HJ. 2017.** Worldclim 2: New 1-km spatial resolution climate surfaces for global land areas. *Int. J. Climatol.* **37**: 4302–4315.
- Olson DM, Dinerstein E, Wikramanayake ED, Burgess ND, Powell GVN, Underwood EC, D’amico JA, Itoua I, Strand HE, Morrison JC, et al. 2001.** Terrestrial Ecoregions of the World: A New Map of Life on Earth: A new global map of terrestrial ecoregions provides an innovative tool for conserving biodiversity. *BioScience* **51**: 933–938.
- Roskov Y, Abucay L, Orrell T, Nicolson D, Bailly N, Kirk PM, Bourgoin T, DeWalt RE, Decock W, De Wever A, Nieukerken E van, Zarucchi J, Penev L, eds. 2017.** *Species 2000 & ITIS Catalogue of Life, 2017 Annual Checklist*. Digital resource at [www.catalogueoflife.org/annual-checklist/2017](http://www.catalogueoflife.org/annual-checklist/2017). *Species 2000: Naturalis, Leiden*, the Netherlands. ISSN 2405-884X. [accessed 1 September 2020].
- Schenk HJ, Jackson RB. 2002a.** Rooting depths, lateral root spreads and below-ground/above-ground allometries of plants in water-limited ecosystems. *Journal of Ecology* **90**: 480–494.
- Schenk HJ, Jackson RB. 2002b.** The global biogeography of roots. *Ecological Monographs* **72**: 311–328.
- Schenk HJ, Jackson RB. 2005.** Mapping the global distribution of deep roots in relation to climate and soil characteristics. *Geoderma* **126**: 129–140.
- Smith SA, Brown JW. 2018.** Constructing a broadly inclusive seed plant phylogeny. *American Journal of Botany* **105**: 302–314.
- Trabucco A, Zomer RJ. 2019.** *Global Aridity Index and Potential Evapo-Transpiration (ET0) Climate Database v2*. figshare. Fileset. <https://doi.org/10.6084/m9.figshare.7504448.v3>. [accessed 10 September, 2020]
- USDA, NRCS. 2021.** The PLANTS Database (<http://plants.usda.gov>). *National Plant Data Team*, Greensboro, NC USA. [accessed 10 September 2021].
